# Supplementary material for: Effects of transcutaneous auricular vagus nerve stimulation on associative memory and event-related potential P300: a single-blind experiment on healthy adults
Source: Research Square preprint supplement (doi:10.21203/rs.3.rs-7263208/v1), 2025-08-08
Supplement: Supplementary file 1 [file 8c10f558ee94e233b812336a.xlsx]

## Sheet: Sheet1
No	Age	Sex (1:M, 2:F)	Salivary amylase		Adverse events by taVNS	taVNS time 1					taVNS time 2					taVNS time 3					Subject's subjective stimulus type (taVNS: 1, sham: 2)	Salivary amylase		Sham time 1					Sham time 2					Sham time 3					Subject's subjective stimulus type (taVNS: 1, sham: 2)
			Pre-taVNS	Post-taVNS		Correct in AM task	Respose time in AM task	Fz P300	Cz P300	Pz P300	Correct in AM task	Respose time in AM task	Fz P300	Cz P300	Pz P300	Correct in AM task	Respose time in AM task	Fz P300	Cz P300	Pz P300		Pre-sham	Post-sham	Correct in AM task	Respose time in AM task	Fz P300	Cz P300	Pz P300	Correct in AM task	Respose time in AM task	Fz P300	Cz P300	Pz P300	Correct in AM task	Respose time in AM task	Fz P300	Cz P300	Pz P300
1	23	1	11	28	None	45	774.5	22.47	23.8	28.84	50	642.9	17.97	21.11	30.04	50	604.7	24.43	27.91	36.04	2	38	42	46	816.6	32.12	32.78	40.05	49	665.9	29.31	33.75	38.31	49	602.6	27.16	29.14	37.4	2
2	23	1	17	17	None	30	968.5	1.22	3.32	2.21	37	979	0.57	0.88	0.75	43	988.9	1.45	0.93	0.81	1	13	19	27	833.9	8.9	8.71	12.68	33	870.6	3.04	7.82	11.68	36	889	-2.54	-2.75	0.93	1
3	23	1	14	31	None	41	683.1	21.4	27	17.2	44	547.6	20.85	23.93	29.18	48	614	18.41	20.41	27.07	2	58	49	49	969.9	22.01	25.53	31.18	50	1210.6	15.77	20.2	25.17	50	1025.4	17.36	20.98	23.57	1
4	21	2	12	23	None	45	1232.7	3.65	-1.67	1.18	46	965.8	2.99	-0.44	2.84	47	865.8	9.24	5.08	6.55	2	32	30	30	727	5.74	5.42	8.94	41	686.1	2.56	1.84	3.27	50	665.2	1.75	1.35	1.92	1
5	24	2	16	31	None	48	1505.3	26.48	25.1	32	49	1085.9	22.27	23.43	30.47	49	1025.9	24.4	29.87	35.69	2	15	18	49	1358.1	22.76	25.38	28.19	50	1028.7	16.41	19.12	20.7	50	900.2	10.4	11.83	14.84	1
6	20	2	28	52	None	27	979	20.32	23.32	23.23	31	798	18.3	25.03	31.66	40	805.2	6.16	8.81	13.5	2	26	25	34	1092.5	19.91	22.85	32.75	40	831.6	12.78	15.75	25.83	47	741.1	3.65	6.7	13.78	2
7	23	1	20	13	None	36	2089.1	13.29	14.17	13.79	42	1212.9	13.18	13.36	15.8	43	1019.6	13.99	15.46	18.39	2	52	58	21	1967.8	2.33	0.75	8.13	30	1710.8	-8.06	-8.45	-8.96	39	1701.8	7.74	7.07	7.65	2
8	20	2	8	16	None	38	1093.6	0.32	-0.14	4.57	36	940.7	4.58	2.65	9.33	29	867.5	39.52	41.66	47.19	2	8	8	23	1369.7	1.01	-4.64	-2.24	29	1448.6	-5.69	-6.44	-7.18	37	1230.4	-1.13	-1.19	1.63	1
9	20	2	59	28	None	27	1082.7	-9.53	-12.93	-13.87	31	922.4	0.12	0.37	3.09	43	844	13.59	11.08	10.39	2	49	74	29	610	-1.41	-5.82	-3.45	33	830.9	8.15	8.07	13.85	41	778.9	7.32	6.2	7.76	1
10	21	2	53	57	None	49	1439.5	-4.7	-6.58	-0.48	48	1037.9	-2.22	-6.25	-4.25	50	866.3	-8.45	-8.672	-3.43	2	139	119	38	1660.2	3.23	2.09	2.68	47	1289.3	3.41	-0.71	0.84	49	991.5	-5.68	-3.5	-3.08	2
11	20	2	145	127	None	27	2411.3	-4.76	-6.55	-8.03	32	1759.5	-6.69	-11.79	-7.98	33	1259.9	2.47	2.84	0.74	1	77	104	40	1927.8	-8.48	-10.3	-8.15	32	1656.8	2.64	2.1	6.56	34	1409.8	-6.07	-5.98	-1.46	2
12	20	2	11	14	None	35	1561.9	-1.56	-2.08	0.92	39	1198.4	0.42	3.26	12.7	43	1028.7	-1.95	0.63	7.74	1	65	48	22	1754.6	1	-2.69	3.47	30	1856.4	-4.54	-4.67	-2.81	37	1414.2	0.45	0.43	8.73	2
13	23	1	120	199	None	34	1073.5	-0.84	0.47	3.3	37	1021.3	-0.49	1.98	6.16	38	837.7	-2.88	-3.56	0.7	1	145	87	34	832.3	2.01	0.88	8.17	34	1067.8	2.36	5.14	9.04	34	943.3	4.26	6.46	15.12	1
14	22	1	27	27	None	38	853.6	5.58	5.57	9.51	34	796	-11.75	-12.35	-8.37	36	804.8	-16.7	-16.13	-9.27	2	25	19	32	1203.5	4.72	4.29	7.27	27	877.8	2.36	5.48	8.75	29	850.5	20.21	21.85	20.68	2
